# Supplementary material for: Enhanced SWIR absorption in chemical bath deposited PbS thin films alloyed with thorium and oxygen
Source: Royal Society of Chemistry journal article supplement (doi:10.1039/c6ra21188g), 2016-01-01
Supplement: c6ra21188g1.pdf [file c6ra21188g1.pdf]

Electronic Supplementary Material (ESI) for RSC Advances.  
This journal is © The Royal Society of Chemistry 2016

## Electronic Supplementary Information

### Enhanced SWIR Absorption in Chemical Bath Deposited PbS Thin Films Alloyed with Thorium and Oxygen

Tzvi Templeman,<sup>a,d</sup> Michael Shandalov,<sup>b</sup> Eyal Yahel,<sup>b</sup> Vladimir Ezersky,<sup>d</sup> Gabby Sarusi<sup>c,d</sup> and Yuval Golant<sup>†,a,d</sup>

<sup>a</sup> Department of Materials Engineering, Ben-Gurion University, Beer Sheva 84105, Israel

<sup>b</sup> Department of Physics, Nuclear Research Center Negev, P.O. Box 9001 Beer Sheva, Israel

<sup>c</sup> Department of Electro-Optics Engineering, Ben-Gurion University, Beer Sheva 84105, Israel

<sup>d</sup> Ilse Katz Institute for Nanoscale Science and Technology, Ben-Gurion University, Beer Sheva 84105, Israel

† Corresponding Author. E-mail: ygolan@bgu.ac.il

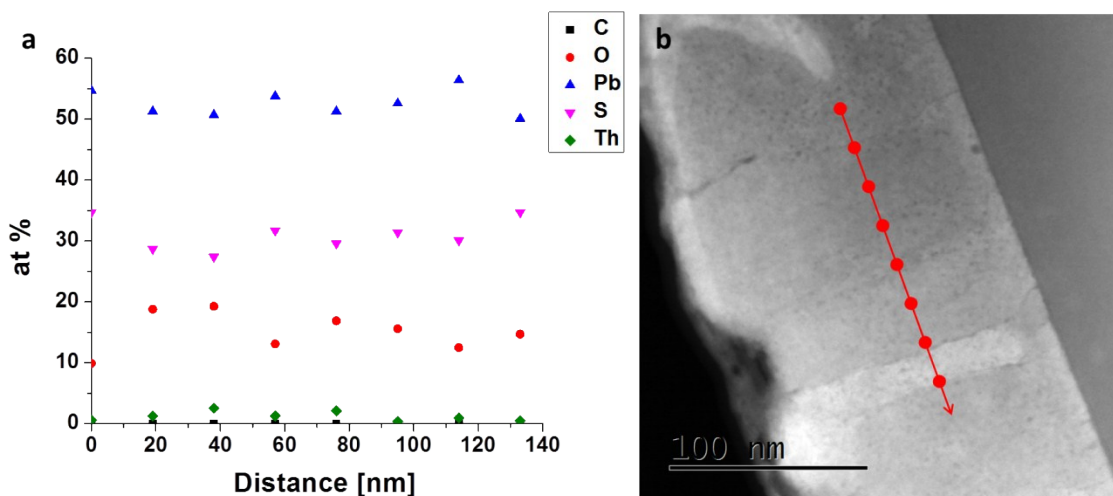

**Figure SI 1.** (a) Atomic composition plotted as a function of film position (b) HAADF STEM X-TEM micrograph of PbS film containing 1at% Th. Red dots depict the EDS line scan performed.

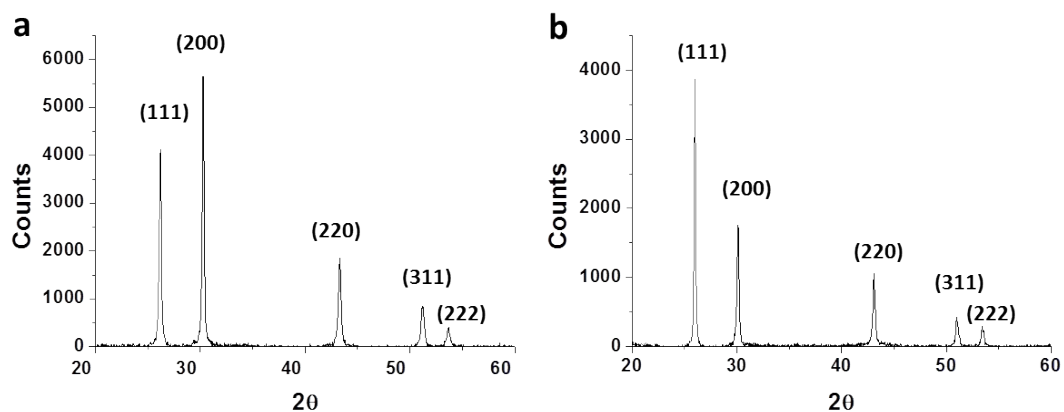

**Figure SI 2.** Normalized diffractograms taken from films grown on glass substrates, (a) PbS and (b) PbS(Th,O).

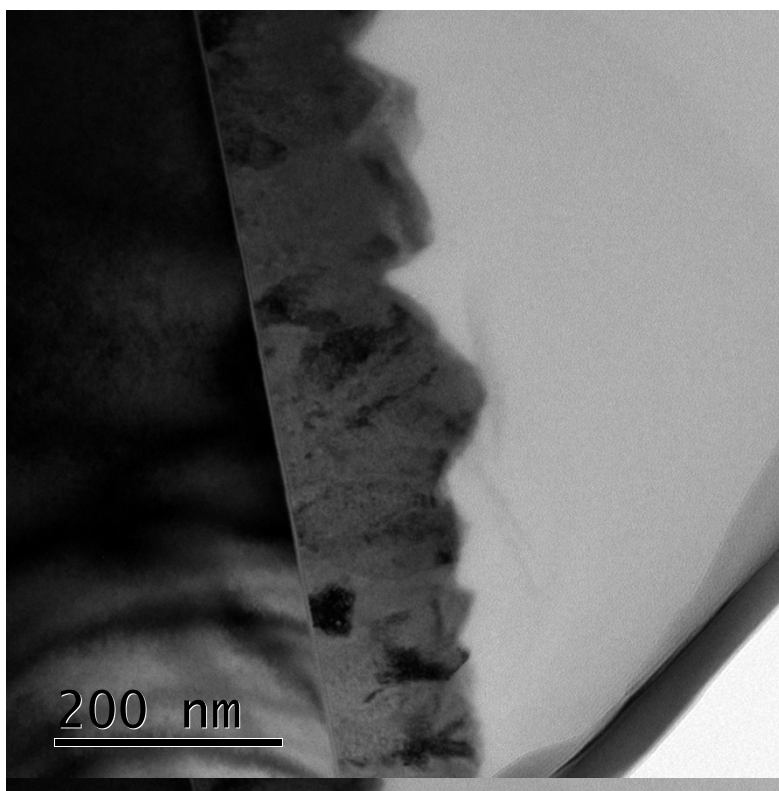

**Figure SI 3.** Bright field X-TEM micrograph of a PbS(Th,O) film with a composition of 8.1at% Th.
